# Supplementary material
Source: publisher figshare collection journal article supplement (https://acs.figshare.com/ndownloader/files/4516438)
Supplement: Supplementary file 1 [file 4516438]

# SUPPORTING INFORMATION

## *fac*-Tricarbonyl Rhenium(I) Azadipyrromethene Complexes

David V. Partyka,<sup>†</sup> Nihal Deligonul,<sup>‡</sup> Marlena P. Washington,<sup>‡</sup> and Thomas G. Gray<sup>\*‡</sup>

*Department of Chemistry, Case Western Reserve University, Cleveland Ohio, 44106 and*

*Creative Chemistry L.L.C., Cleveland Ohio, 44106*

### Contents

Experimental

Table S1. Optimized Cartesian coordinates of **2**

References

Figures S1 and S2. Thermal ellipsoid projections of **3** and **5**, respectively

Figure S3. Partial Kohn-Sham orbital energy level diagram of **2**.

Figure S4. Optimized bond lengths calculated for **2**.

## Experimental

All solvents and were used as received. Tris(aquo)rhenium(I) tricarbonyl chloride ( $[\text{Re}(\text{H}_2\text{O})_3(\text{CO})_3]\text{Cl}$ ) was synthesized according to the literature procedure.<sup>1</sup> The protonated form of [(3,5-diphenyl-1*H*-pyrrol-2-yl)(3,5-diphenylpyrrol-2-ylidene)amine] was synthesized according to the literature procedure.<sup>2</sup> All other chemicals and solvents were purchased and used as received. Microanalyses (C, H, and N) were performed by Quantitative Technologies Inc. All NMR spectra ( $^1\text{H}$ ,  $^{13}\text{C}$  and  $^{31}\text{P}\{^1\text{H}\}$ ) were recorded in  $\text{CDCl}_3$  on a Varian AS-400 spectrometer operating at 399.7, 100.5 and 161.8 MHz respectively. For compounds **1-3**, abbreviations for tetrahydrofuran, pyridine, tetrahydrothiophene, and triphenylphosphine are written as THF, pyr, THT, and  $\text{PPh}_3$  respectively.

**[(3,5-Diphenyl-1*H*-pyrrol-2-yl)(3,5-diphenylpyrrol-2-ylidene)amine] $\text{Re}(\text{CO})_3(\text{THF})$  • THF (**1**).** In a round bottom flask,  $[\text{Re}(\text{CO})_3(\text{H}_2\text{O})_3]\text{Cl}$  (60 mg, 0.017 mmol) and 1 equiv tetraphenylazadipyrromethene (74.5 mg, 0.17 mmol) were suspended in 1 mL of 1-butanol. A solution of potassium *tert*-butoxide (19 mg, 0.17 mmol) in 4 mL of 1-butanol was added to the mixture and the resultant mixture was refluxed under argon for 24 h. The 1-butanol was removed by rotary evaporation, and dry THF (10 mL) was added to dissolve the residue. The solution was heated in a 65 °C oil bath for 12 h, and the THF removed by rotary evaporation. The residue was re-dissolved in a minimum of dry THF, filtered through Celite, and pentane vapor was diffused into the saturated THF solution, causing separation of bronze crystalline chunks. The crystalline chunks were carefully collected to the exclusion of the blue residue, redissolved in a minimum of dry THF, filtered through Celite and recrystallized again (by vapor diffusion of pentane). The bronze, crystalline chunks that separated were again collected to the exclusion of the accompanying blue residue (much less residue than in first iteration) and dried. Yield: 66 mg (46%).  $^1\text{H}$  NMR:  $\delta$  7.88-7.94 (m, 4H), 7.79-7.84 (m, 4H), 7.49-7.57 (m, 6H), 7.34-7.40 (m, 6H), 7.04 (s, 2H, pyrrolic *CH*), 3.75 (m, 4H, lattice THF), 3.20 (m, 4H, coordinated THF), 1.86 (m, 4H, lattice THF), 1.62 (m, 4H, coordinated THF) ppm. UV-Vis ( $\text{CHCl}_3$ ):  $\lambda$  ( $\epsilon$ ) 253 (38100), 288 (38300), 298 (sh, 35700), 367 (4900), 594 (49500) nm. IR (KBr,  $\text{cm}^{-1}$ ): 2015, 1904, 1891, 1887 ( $\nu_{\text{CO}}$ , vs)  $\text{cm}^{-1}$ . Anal. Calcd. for  $\text{C}_{39}\text{H}_{30}\text{N}_3\text{O}_4\text{Re} \cdot \text{C}_4\text{H}_8\text{O}$ : C, 59.85; H, 4.44; N, 4.86. Found: C, 60.32; H, 4.39; N, 4.78.

**{[(3,5-Diphenyl-1*H*-pyrrol-2-yl)(3,5-diphenylpyrrol-2-ylidene)amine] Re(CO)<sub>3</sub>(pyr)} (2).**

Compound **1** (35 mg, 0.041 mmol) was dissolved in a minimum of pyridine and filtered through a small amount of Celite. Pentane vapor was diffused into the saturated solution of **1**, yielding **2** (over ~2-3 days) in quantitative yield as sparkling, dark green crystals. Yield: 32 mg (99%). <sup>1</sup>H NMR: δ 7.91 (d, 4H, *J* = 6.4 Hz), 7.50-7.70 (m, 14H), 7.21-7.31 (m, 5H), 7.09 (s, 2H, pyrrolic *CH*), 7.06-7.11 (m, 2H) ppm. UV-Vis (CHCl<sub>3</sub>): λ (ε) 253 (38100), 288 (38300), 298 (sh, 35700), 367 (4900), 594 (49500) nm. IR (KBr, cm<sup>-1</sup>): 2015, 1924, 1919, 1898 (ν<sub>CO</sub>, vs) cm<sup>-1</sup>. Anal. Calcd. for C<sub>40</sub>H<sub>27</sub>N<sub>4</sub>O<sub>3</sub>Re: C, 60.21; H, 3.41; N, 7.02. Found: C, 60.49; H, 3.20; N, 7.29.

**{[(3,5-Diphenyl-1*H*-pyrrol-2-yl)(3,5-diphenylpyrrol-2-ylidene)amine] Re(CO)<sub>3</sub>(THT)} (3).**

Compound **1** (35 mg, mol) was dissolved in a minimum of tetrahydrothiophene and filtered through a small amount of Celite. Pentane vapor was diffused into the saturated solution of **1**, yielding **3** (over ~2-3 days) in quantitative yield as lime green crystals. Yield: 33 mg (100%). <sup>1</sup>H NMR: δ 7.90-7.94 (m, 4H), 7.76-7.80 (m, 4H), 7.48-7.56 (m, 6H), 7.34-7.40 (m, 6H), 7.04 (s, 2H, pyrrolic *CH*), 2.60-2.65 (m, 4H, (CH<sub>2</sub>)<sub>4</sub>S), 1.74-1.80 (m, 4H, (CH<sub>2</sub>)<sub>4</sub>S) ppm. UV-Vis (CHCl<sub>3</sub>): λ (ε) 251 (24500), 299 (sh, 24500), 374 (3800), 589 (43300) nm. IR (KBr, cm<sup>-1</sup>): 2014, 1924, 1919, 1896 (ν<sub>CO</sub>, vs) cm<sup>-1</sup>. Anal. Calcd. for C<sub>39</sub>H<sub>30</sub>N<sub>3</sub>O<sub>3</sub>ReS: C, 58.05; H, 3.75; N, 5.21. Found: C, 58.30; H, 3.51; N, 5.20.

**{[(3,5-Diphenyl-1*H*-pyrrol-2-yl)(3,5-diphenylpyrrol-2-ylidene)amine]Re(CO)<sub>3</sub>(*N*-benzylimidazole)} (4).** In 2 mL dichloromethane **1** (29 mg, 0.034 mmol) was dissolved. To this solution, *N*-benzylimidazole (5.4 mg, 0.034 mmol) in 1 mL of dichloromethane was added. The solution was stirred for 2 h and the solvent removed by rotary evaporation. Recrystallization (pentane/THF) yielded bronze, crystalline chunks that were collected. Yield: 22 mg (74%). <sup>1</sup>H NMR: δ 7.85-7.90 (m, 4H), 7.68-7.73 (m, 4H), 7.47-7.58 (m, 6H), 7.24-7.35 (m, 6H), 7.19 (t, 1H, *J* = 7.2 Hz), 7.03 (s, 2H, pyrrolic *CH*), 6.90 (t, 2H, *J* = 7.6 Hz), 6.79 (d, 2H, *J* = 6.8 Hz), 6.66-6.68 (m, 1H), 6.52 (t, 1H, *J* = 1.6 Hz), 6.30 (t, 1H, *J* = 1.6 Hz), 4.85 (s, 2H, benzyl-CH<sub>2</sub>) ppm. UV-Vis (CHCl<sub>3</sub>): λ (ε) 255 (46100), 285 (46500), 300 (sh, 39900), 373 (3200), 590 (52000) nm. IR (KBr, cm<sup>-1</sup>): 2007, 1891, 1876 (ν<sub>CO</sub>, vs) cm<sup>-1</sup>. Anal. Calcd. for C<sub>45</sub>H<sub>32</sub>N<sub>5</sub>O<sub>3</sub>Re: C, 61.63; H, 3.68; N, 7.99. Found: C, 61.90; H, 3.96; N, 7.74.

**{[(3,5-Diphenyl-1*H*-pyrrol-2-yl)(3,5-diphenylpyrrol-2-ylidene)amine]Re(CO)<sub>3</sub>(*tert*-butylisocyanide)}** (**5**). In a glovebox, **1** (29.5 mg, 0.034 mmol) was dissolved in 4 mL of dichloromethane, and 2 drops (using a 9 inch disposable glass Pasteur pipet) of *tert*-butylisocyanide were added (isocyanide was in molar excess). The solution was stirred for 1 h, and the solvent removed by rotary evaporation. The residue was pumped on a vacuum line for several hours to remove trace, unreacted isocyanide. In air, the residue was dissolved in a minimum of dry THF, filtered through Celite, and pentane vapor was diffused to cause separation of metallic-brown crystalline blocks, which were collected, washed with pentane and dried. Yield: 24.5 mg (89%). <sup>1</sup>H NMR: δ 7.89-7.94 (m, 4H), 7.76-7.80 (m, 4H), 7.45-7.56 (m, 6H), 7.32-7.40 (m, 6H), 7.05 (s, 2H, pyrrolic CH), 1.18 (s, 9H, C(CH<sub>3</sub>)<sub>3</sub>) ppm. <sup>13</sup>C NMR: δ 195.61 (s, C<sub>CO-axial</sub>), 190.23 (s, C<sub>CO-equatorial</sub>), 167.62 (s, C<sub>CNtBu</sub>), 145.09 (s), 144.71 (s), 137.18 (s), 134.27 (s), 129.62 (s), 129.35 (s), 129.22 (s), 128.21 (s), 128.10 (s), 128.01 (s), 127.57 (s), 120.06 (s), 57.50 (s, C(CH<sub>3</sub>)<sub>3</sub>), 29.98 (s, C(CH<sub>3</sub>)<sub>3</sub>) ppm. UV-Vis (CHCl<sub>3</sub>): λ (ε) 255 (45600), 286 (46500), 299 (sh, 35800), 371 (3600), 588 (38500) nm. IR (KBr, cm<sup>-1</sup>): 2188 (ν<sub>C≡NtBu</sub>, s), 2013, 1906 (ν<sub>CO</sub>, vs) cm<sup>-1</sup>. Anal. Calcd. for C<sub>40</sub>H<sub>31</sub>N<sub>4</sub>O<sub>3</sub>Re: C, 59.91; H, 3.90; N, 6.99. Found: C, 60.07; H, 3.95; N, 7.01.

**Luminescence Measurements.** Steady state emission spectra were recorded on an automated Photon Technology International (PTI) QM 4 fluorimeter equipped with a 150-W Xe arc lamp and a Hamamatsu R928 photomultiplier tube. Excitation light was excluded with appropriate glass filters. Sample solutions were added to a quartz EPR tube, freeze pump thaw degassed (4 cycles, 1 × 10<sup>-5</sup> Torr) and flame sealed. Low temperature emission spectra were recorded in rigid solvent glass at 77 K by immersion of the sealed EPR tubes into a liquid nitrogen filled dewer.

**Electrochemistry.** Tetrabutylammonium hexafluorophosphate (Fluka) was recrystallized using ethyl acetate and ether. It was dried thoroughly under vacuum and stored in a nitrogen drybox. Tetrahydrofuran (Fisher Scientific) was distilled over sodium/benzophenone and stored in a nitrogen drybox. Ferrocene (Aldrich) was purified via sublimation and stored under nitrogen. All glassware was cleaned and oven-dried overnight before use. Cyclic voltammetry experiments were performed in a nitrogen-filled Vacuum Atmospheres drybox

outfitted with a CH Instrument Workstation at room temperature. A glassy carbon working electrode was polished with 0.05- $\mu\text{m}$  alumina and thoroughly cleaned and dried before use. A silver wire was utilized as a quasi-reference electrode, and a platinum wire was the counter electrode. All scans were performed at a scan rate of 0.1V/s.

Concentration of Supporting Electrolyte: 0.1M  $\text{Bu}_4\text{NPF}_6$

Concentration of all azadipyrromethenes and their complexes: 0.001M

Concentration of Ferrocene: 0.001M

**Crystallography.** Single crystal X-ray data were collected on a Bruker AXS SMART APEX CCD diffractometer using monochromatic Mo  $K\alpha$  radiation with omega scan technique. The unit cells were determined using SMART<sup>3</sup> and SAINT+.<sup>4</sup> Data collection for all crystals was conducted at 100 K (-173.5°C). All structures were solved by direct methods and refined by full matrix least squares against  $F^2$  with all reflections using SHELXTL.<sup>5</sup> Refinement of extinction coefficients was found to be insignificant. All non-hydrogen atoms were refined anisotropically. All hydrogen atoms were placed in standard calculated positions and all hydrogen atoms were refined with an isotropic displacement parameter 1.2 times that of the adjacent carbon.

**Computations.** Spin-restricted density-functional theory computations were performed within the Gaussian 03 program suite.<sup>6</sup> Calculations employed the modified Perdew-Wang exchange functional of Adamo and Barone<sup>7</sup> and the original Perdew-Wang correlation functional.<sup>8</sup> Nonmetal atoms were described with the TZVP basis set of Godbelt, Andzelm, and co-workers.<sup>9</sup> Rhenium orbitals were described with the Stuttgart effective core potential and the associated basis set,<sup>10</sup> which was contracted as follows: Re, (8s,7p,6d) $\rightarrow$ [6s,5p,3d]. Relativity with the Stuttgart ECP and its associated basis set is introduced with a potential term (*i.e.*, a one-electron operator) that replaces the two-electron exchange and Coulomb operators resulting from interaction between core electrons and between core and valence electrons. In this way relativistic effects, especially scalar effects, are included implicitly rather than as four-component, one-electron functions in the Dirac equation. Geometries were optimized without imposed symmetry, and harmonic frequency calculations find all structures to be potential energy minima. All calculated properties reported here include implicit chloroform solvation ( $\epsilon = 4.9$ , 298.15 K), which was incorporated in single-point calculations of the gas-phase

geometries with Tomasi's polarizable continuum model (PCM).<sup>11,12</sup> The stability of each converged density was confirmed by calculation of the eigenvalues of the  $A$  matrix.<sup>13,14</sup> Percentage compositions of molecular orbitals, overlap populations, and bond orders between fragments were calculated using the AOMix program of Gorelsky.<sup>15,16</sup>

**Table S1.** Optimized Cartesian coordinates (Å) of **2**.

| Center<br>Number | Atomic<br>Number | Atomic<br>Type | Coordinates (Angstroms) |           |           |
|------------------|------------------|----------------|-------------------------|-----------|-----------|
|                  |                  |                | X                       | Y         | Z         |
| 1                | 75               | 0              | -1.661412               | 0.017897  | 0.211386  |
| 2                | 6                | 0              | -2.830390               | -1.299306 | 1.018727  |
| 3                | 8                | 0              | -3.546250               | -2.046423 | 1.576721  |
| 4                | 6                | 0              | -2.733530               | 0.032634  | -1.382799 |
| 5                | 8                | 0              | -3.394735               | 0.040273  | -2.357747 |
| 6                | 6                | 0              | -2.800905               | 1.363243  | 1.014746  |
| 7                | 8                | 0              | -3.500255               | 2.131616  | 1.564831  |
| 8                | 6                | 0              | 1.191830                | -1.203934 | -0.518217 |
| 9                | 7                | 0              | -0.354883               | -0.004598 | 2.074763  |
| 10               | 6                | 0              | 0.026945                | 1.150870  | 2.673903  |
| 11               | 6                | 0              | 0.036241                | -1.173407 | 2.640742  |
| 12               | 6                | 0              | 0.790355                | 1.178109  | 3.843031  |
| 13               | 1                | 0              | -0.294098               | 2.069833  | 2.182213  |
| 14               | 6                | 0              | 0.799775                | -1.227315 | 3.809095  |
| 15               | 1                | 0              | -0.277582               | -2.080548 | 2.122939  |
| 16               | 6                | 0              | 1.184184                | -0.031628 | 4.427213  |
| 17               | 1                | 0              | 1.067833                | 2.138598  | 4.279444  |
| 18               | 1                | 0              | 1.084426                | -2.197428 | 4.218841  |
| 19               | 1                | 0              | 1.779057                | -0.042163 | 5.342792  |
| 20               | 7                | 0              | 1.780508                | -0.017709 | -0.435991 |
| 21               | 7                | 0              | -0.190286               | -1.484267 | -0.504816 |
| 22               | 7                | 0              | -0.151899               | 1.493509  | -0.481994 |
| 23               | 6                | 0              | 1.222615                | 1.185479  | -0.419979 |
| 24               | 6                | 0              | 1.948354                | -2.445449 | -0.624250 |
| 25               | 6                | 0              | 0.991688                | -3.454416 | -0.665488 |
| 26               | 6                | 0              | -0.297151               | -2.842634 | -0.618047 |
| 27               | 6                | 0              | -0.226009               | 2.854244  | -0.582525 |
| 28               | 6                | 0              | 1.075227                | 3.440172  | -0.541212 |
| 29               | 6                | 0              | 2.008206                | 2.413971  | -0.437008 |
| 30               | 1                | 0              | 1.160471                | -4.516515 | -0.828652 |
| 31               | 1                | 0              | 1.270722                | 4.507776  | -0.612683 |
| 32               | 6                | 0              | -1.455549               | 3.641473  | -0.764391 |
| 33               | 6                | 0              | -1.626930               | 4.844263  | -0.041344 |
| 34               | 6                | 0              | -2.436156               | 3.276744  | -1.712454 |
| 35               | 6                | 0              | -2.763836               | 5.636169  | -0.233345 |
| 36               | 1                | 0              | -0.871057               | 5.140806  | 0.690421  |
| 37               | 6                | 0              | -3.568049               | 4.075748  | -1.907910 |
| 38               | 1                | 0              | -2.291844               | 2.380996  | -2.315492 |
| 39               | 6                | 0              | -3.740800               | 5.252432  | -1.164387 |
| 40               | 1                | 0              | -2.889544               | 6.553183  | 0.347141  |
| 41               | 1                | 0              | -4.314285               | 3.779012  | -2.648482 |
| 42               | 1                | 0              | -4.628370               | 5.871434  | -1.314314 |
| 43               | 6                | 0              | -1.547959               | -3.606636 | -0.751317 |
| 44               | 6                | 0              | -1.711011               | -4.804319 | -0.017882 |
| 45               | 6                | 0              | -2.557077               | -3.230564 | -1.664379 |
| 46               | 6                | 0              | -2.866791               | -5.578722 | -0.163312 |
| 47               | 1                | 0              | -0.930812               | -5.110871 | 0.683679  |
| 48               | 6                | 0              | -3.707919               | -4.012181 | -1.813779 |
| 49               | 1                | 0              | -2.421242               | -2.340882 | -2.278048 |
| 50               | 6                | 0              | -3.871829               | -5.182648 | -1.058568 |

|    |   |   |           |           |           |
|----|---|---|-----------|-----------|-----------|
| 51 | 1 | 0 | -2.984853 | -6.491825 | 0.424906  |
| 52 | 1 | 0 | -4.476147 | -3.707022 | -2.527973 |
| 53 | 1 | 0 | -4.774188 | -5.787798 | -1.172369 |
| 54 | 6 | 0 | 3.402907  | -2.615315 | -0.702365 |
| 55 | 6 | 0 | 4.250273  | -1.639167 | -1.278069 |
| 56 | 6 | 0 | 3.991675  | -3.809441 | -0.219263 |
| 57 | 6 | 0 | 5.631009  | -1.853281 | -1.360600 |
| 58 | 1 | 0 | 3.813790  | -0.716762 | -1.659556 |
| 59 | 6 | 0 | 5.370599  | -4.020188 | -0.306909 |
| 60 | 1 | 0 | 3.355766  | -4.565634 | 0.247831  |
| 61 | 6 | 0 | 6.198679  | -3.041733 | -0.878972 |
| 62 | 1 | 0 | 6.264989  | -1.085634 | -1.810902 |
| 63 | 1 | 0 | 5.802108  | -4.947794 | 0.077517  |
| 64 | 1 | 0 | 7.276703  | -3.206001 | -0.948594 |
| 65 | 6 | 0 | 3.467978  | 2.552732  | -0.405758 |
| 66 | 6 | 0 | 4.300665  | 1.615956  | 0.251812  |
| 67 | 6 | 0 | 4.079483  | 3.674032  | -1.018086 |
| 68 | 6 | 0 | 5.687984  | 1.798714  | 0.291241  |
| 69 | 1 | 0 | 3.848034  | 0.744912  | 0.724900  |
| 70 | 6 | 0 | 5.464611  | 3.854763  | -0.972174 |
| 71 | 1 | 0 | 3.457457  | 4.392806  | -1.556643 |
| 72 | 6 | 0 | 6.277237  | 2.917180  | -0.315898 |
| 73 | 1 | 0 | 6.311041  | 1.061830  | 0.804032  |
| 74 | 1 | 0 | 5.913209  | 4.724377  | -1.458763 |
| 75 | 1 | 0 | 7.360389  | 3.056894  | -0.281268 |

---

## References

- <sup>1</sup> Franklin, B. R.; Kerrick, R. S.; Ziegler, C. J.; Çetin, A.; Barone, N.; Condon, L. R. *Inorg. Chem.* **2008**, *47*, 5902–5909.
- <sup>2</sup> Gorman, A.; Killoran, J.; O’Shea, C.; Kenna, T.; Gallagher, W. M.; O’Shea, D. F. *J. Am. Chem. Soc.* **2004**, *126*, 10619-10631.
- <sup>3</sup> Bruker Advanced X-ray Solutions, *SMART for WNT/2000* (Version 5.628), Bruker AXS Inc., Madison, Wisconsin: USA, 1997-2002.
- <sup>4</sup> Bruker Advanced X-ray Solutions, *SAINT* (Version 6.45), Bruker AXS Inc., Madison, Wisconsin: U.S.A., 1997-2003.
- <sup>5</sup> Bruker Advanced X-ray Solutions *SHELXTL* (Version 6.10), Bruker AXS Inc., Madison, Wisconsin: U.S.A., 2000.
- <sup>6</sup> Gaussian 03, Revision D.01, Frisch, M. J.; Trucks, G. W.; Schlegel, H. B.; Scuseria, G. E.; Robb, M. A.; Cheeseman, J. R.; Montgomery, Jr., J. A.; Vreven, T.; Kudin, K. N.; Burant, J. C.; Millam, J. M.; Iyengar, S. S.; Tomasi, J.; Barone, V.; Mennucci, B.; Cossi, M.; Scalmani, G.; Rega, N.; Petersson, G. A.; Nakatsuji, H.; Hada, M.; Ehara, M.; Toyota, K.; Fukuda, R.;



Hasegawa, J.; Ishida, M.; Nakajima, T.; Honda, Y.; Kitao, O.; Nakai, H.; Klene, M.; Li, X.; Knox, J. E.; Hratchian, H. P.; Cross, J. B.; Bakken, V.; Adamo, C.; Jaramillo, J.; Gomperts, R.; Stratmann, R. E.; Yazyev, O.; Austin, A. J.; Cammi, R.; Pomelli, C.; Ochterski, J. W.; Ayala, P. Y.; Morokuma, K.; Voth, G. A.; Salvador, P.; Dannenberg, J. J.; Zakrzewski, V. G.; Dapprich, S.; Daniels, A. D.; Strain, M. C.; Farkas, O.; Malick, D. K.; Rabuck, A. D.; Raghavachari, K.; Foresman, J. B.; Ortiz, J. V.; Cui, Q.; Baboul, A. G.; Clifford, S.; Cioslowski, J.; Stefanov, B. B.; Liu, G.; Liashenko, A.; Piskorz, P.; Komaromi, I.; Martin, R. L.; Fox, D. J.; Keith, T.; Al-Laham, M. A.; Peng, C. Y.; Nanayakkara, A.; Challacombe, M.; Gill, P. M. W.; Johnson, B.; Chen, W.; Wong, M. W.; Gonzalez, C.; and Pople, J. A.; Gaussian, Inc., Wallingford CT, 2004.

<sup>7</sup> Adamo, C.; Barone, V. *J. Chem. Phys.* **1998**, *108*, 664.

<sup>8</sup> Perdew, J. P.; Wang, Y. *Phys. Rev. B* **1992**, *45*, 13244.

<sup>9</sup> Godbout, N.; Salahub, D. R.; Andzelm, J.; Wimmer, E. *Can. J. Chem.* **1992**, *70*, 560.

<sup>10</sup> (a) Andrae, D.; Haeussermann, U.; Dolg, M.; Stoll, H.; Preuss, H. *Theor. Chim. Acta* **1990** *77* 123–141. (b) The Basis sets and core potential for rhenium were obtained from the Extensible Computational Chemistry Environment Basis Set Database, Version 02/25/04, as developed and distributed by the Molecular Science Computing Facility, Environmental and Molecular Sciences Laboratory which is part of the Pacific Northwest Laboratory, P.O. Box 999, Richland, Washington 99352, USA, and funded by the U.S. Department of Energy. The Pacific Northwest Laboratory is a multi-program laboratory operated by Battelle Memorial Institute for the U.S. Department of Energy under contract DE-AC06-76RLO 1830. Contact Karen Schuchardt for further information.

<sup>11</sup> Miertus S.; Scrocco, E.; Tomasi, J. *Chem. Phys.* **1981**, *55*, 117–129.

<sup>12</sup> Tomasi, J.; Mennucci, B.; Cammi, R. *Chem. Rev.* **2005**, *105*, 2999–3093.

<sup>13</sup> Seeger, R.; Pople, J. A. *J. Chem. Phys.* **1977**, *66*, 3045.

<sup>14</sup> Bauernschmitt, R.; Alrichs, R. *J. Chem. Phys.* **1996**, *104*, 9047.

<sup>15</sup> Gorelsky, S. I. AOMix: Program for Molecular Orbital Analysis; York University: Toronto, 1997, <http://www.sg-chem.net>.

<sup>16</sup> Gorelsky, S. I.; Lever, A. B. P. *J. Organomet. Chem.* **2001**, *635*, 187.

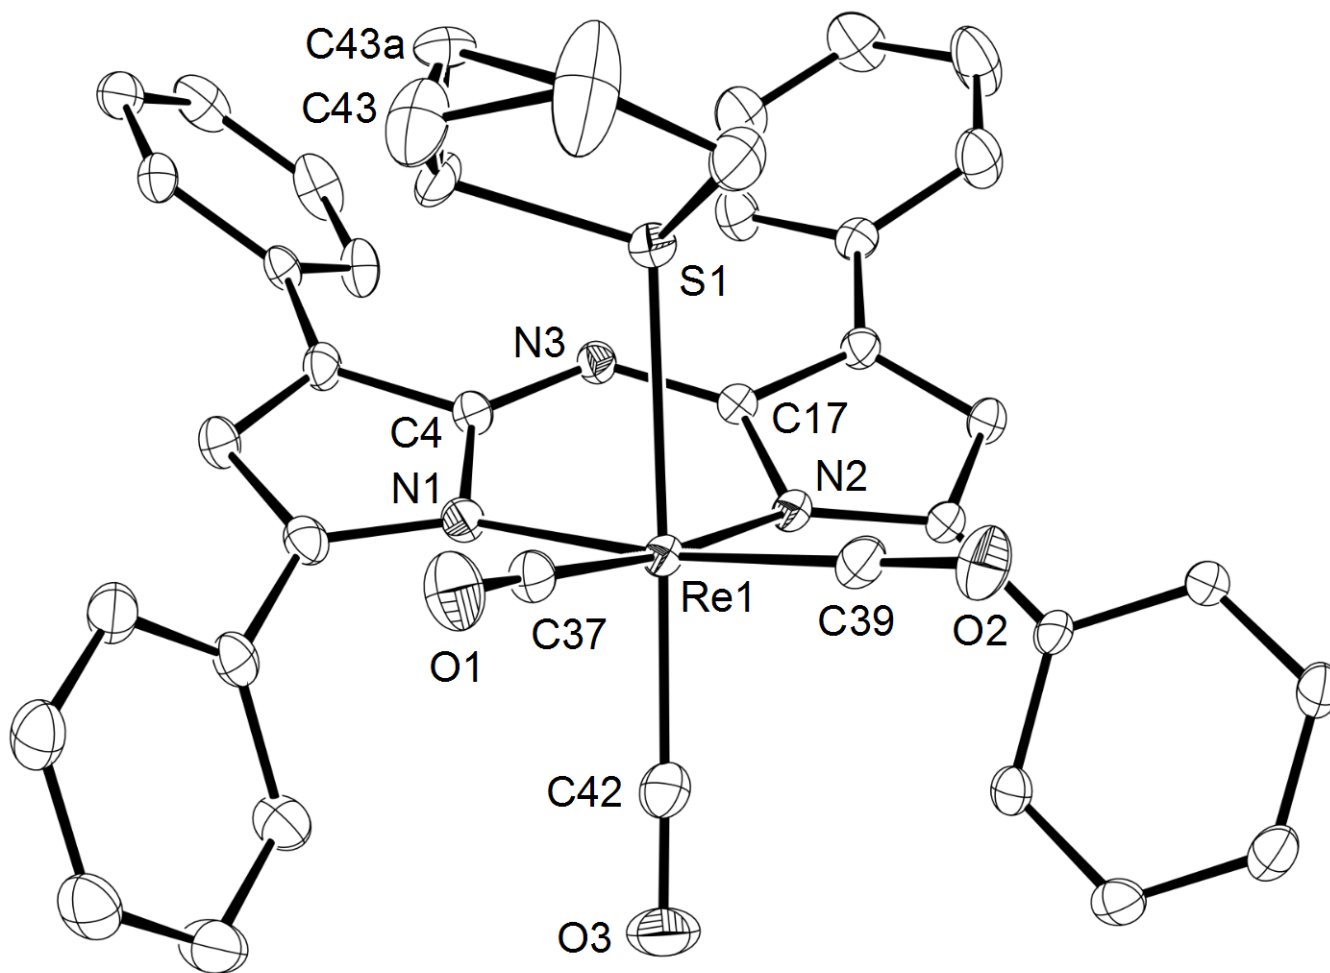

**Figure S1.** Crystal structure of **3** (100 K, 50% probability). H atoms are omitted for clarity. Unlabeled atoms are carbon.

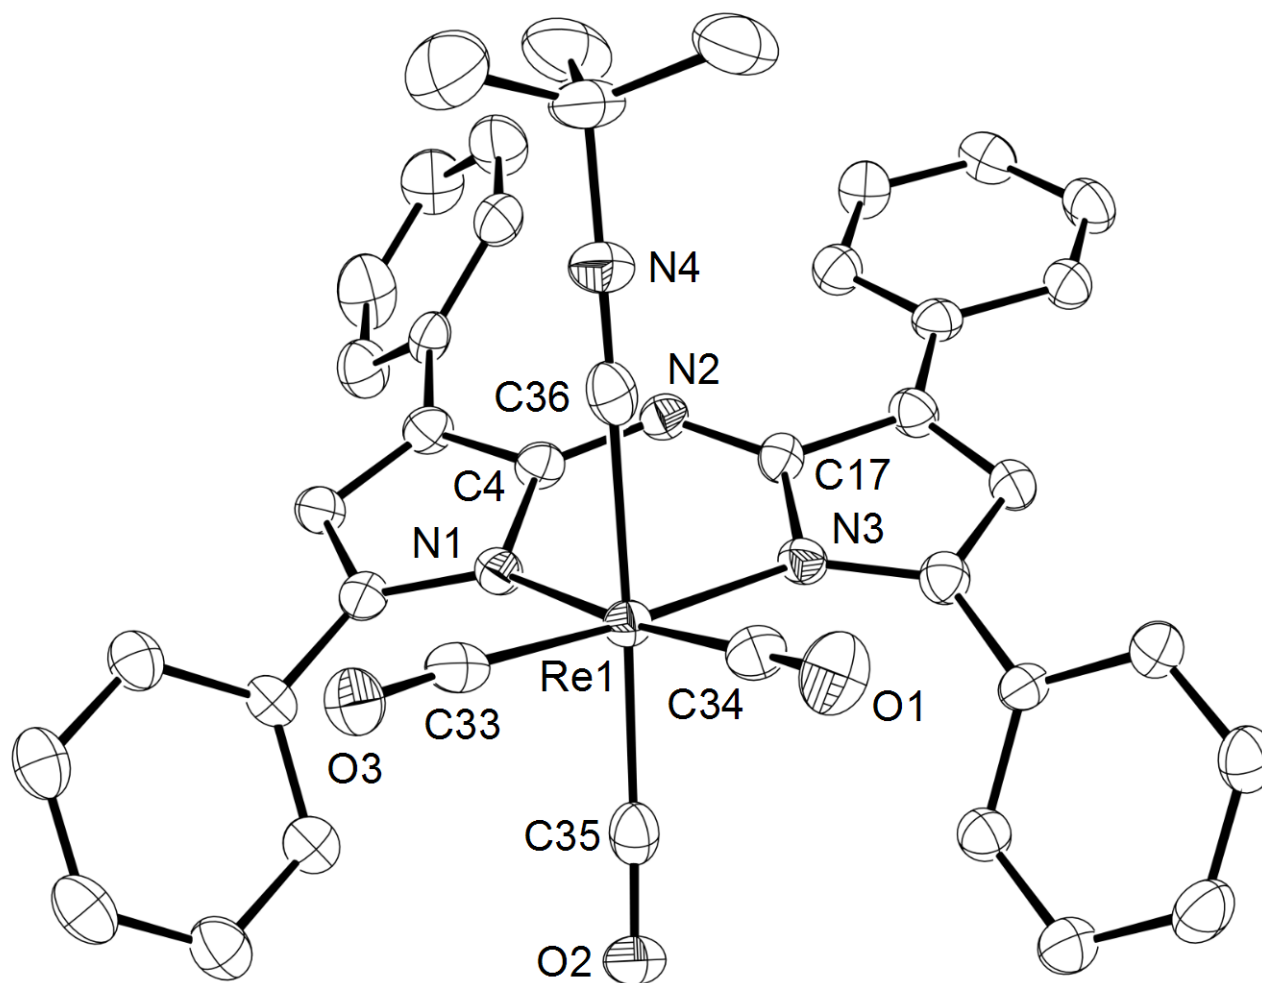

**Figure S2.** Crystal structure of **5** (100 K, 50% probability). H atoms are omitted for clarity. Unlabeled atoms are carbon.

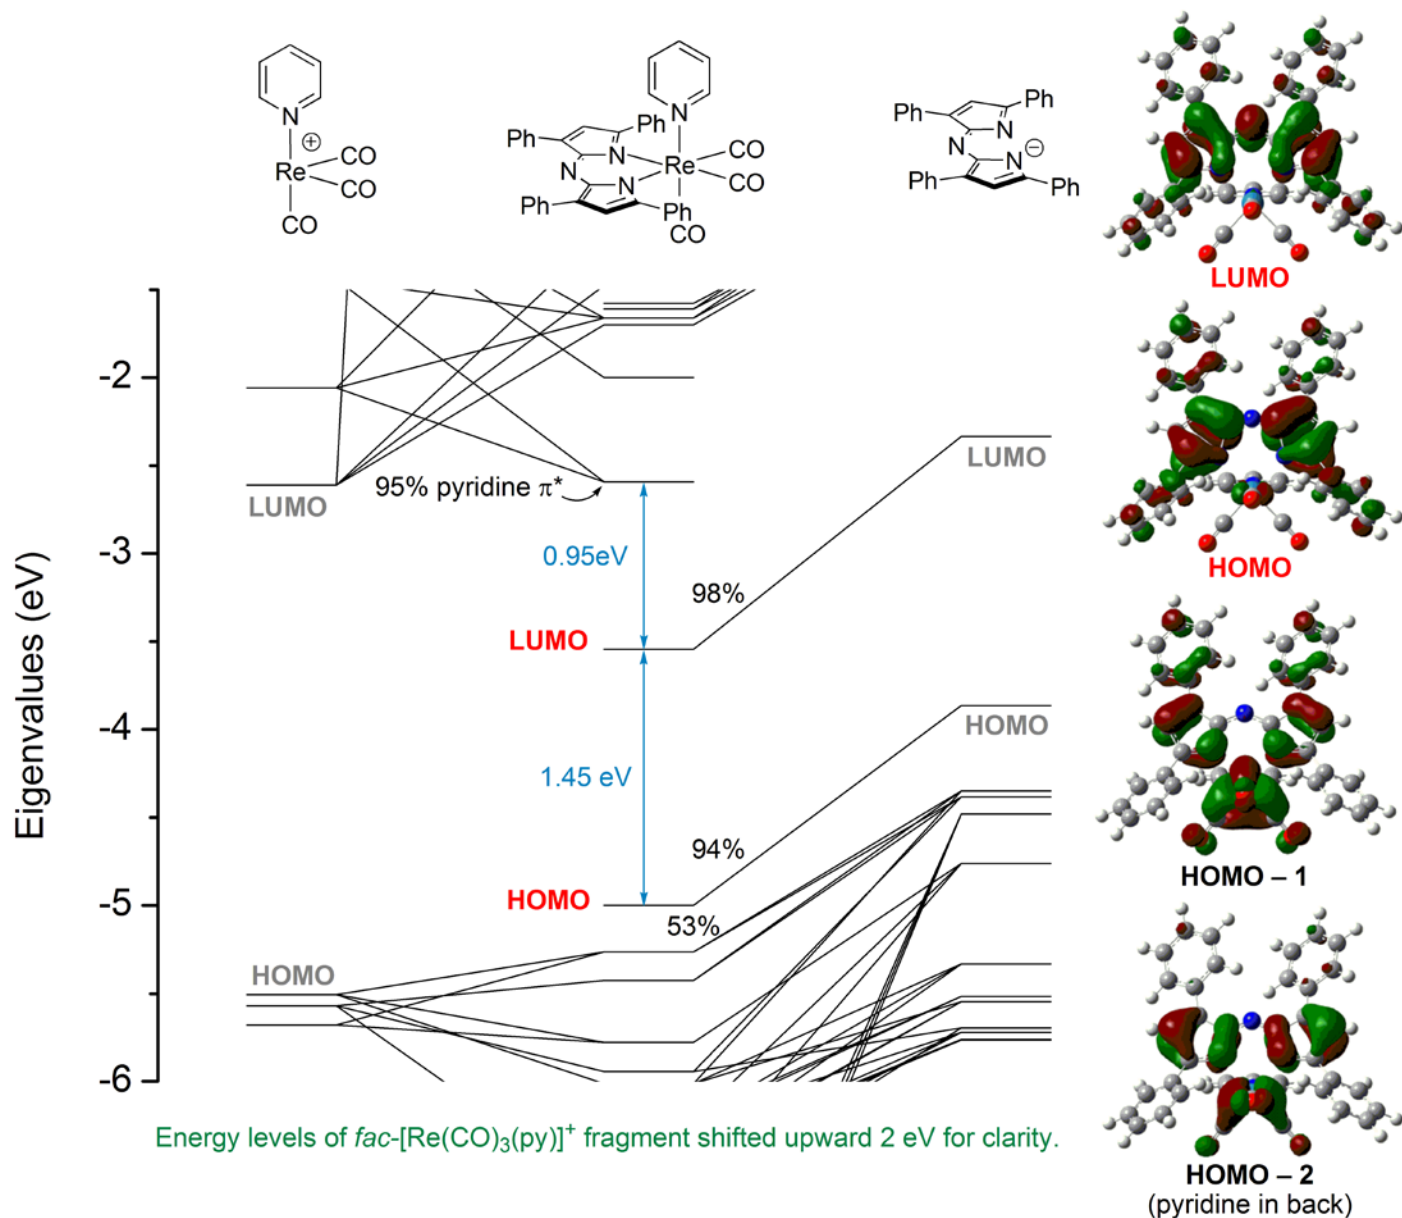

**Figure S3.** Partial Kohn-Sham orbital correlation diagram of pyridine complex **2** (mpmpw91/Stuttgart ECP and basis on Re); implicit chloroform solvation is included through a continuum dielectric model (PCM). Right: plots of selected orbitals (contour level 0.03 a.u.). Percentage contributions of fragments are indicated.

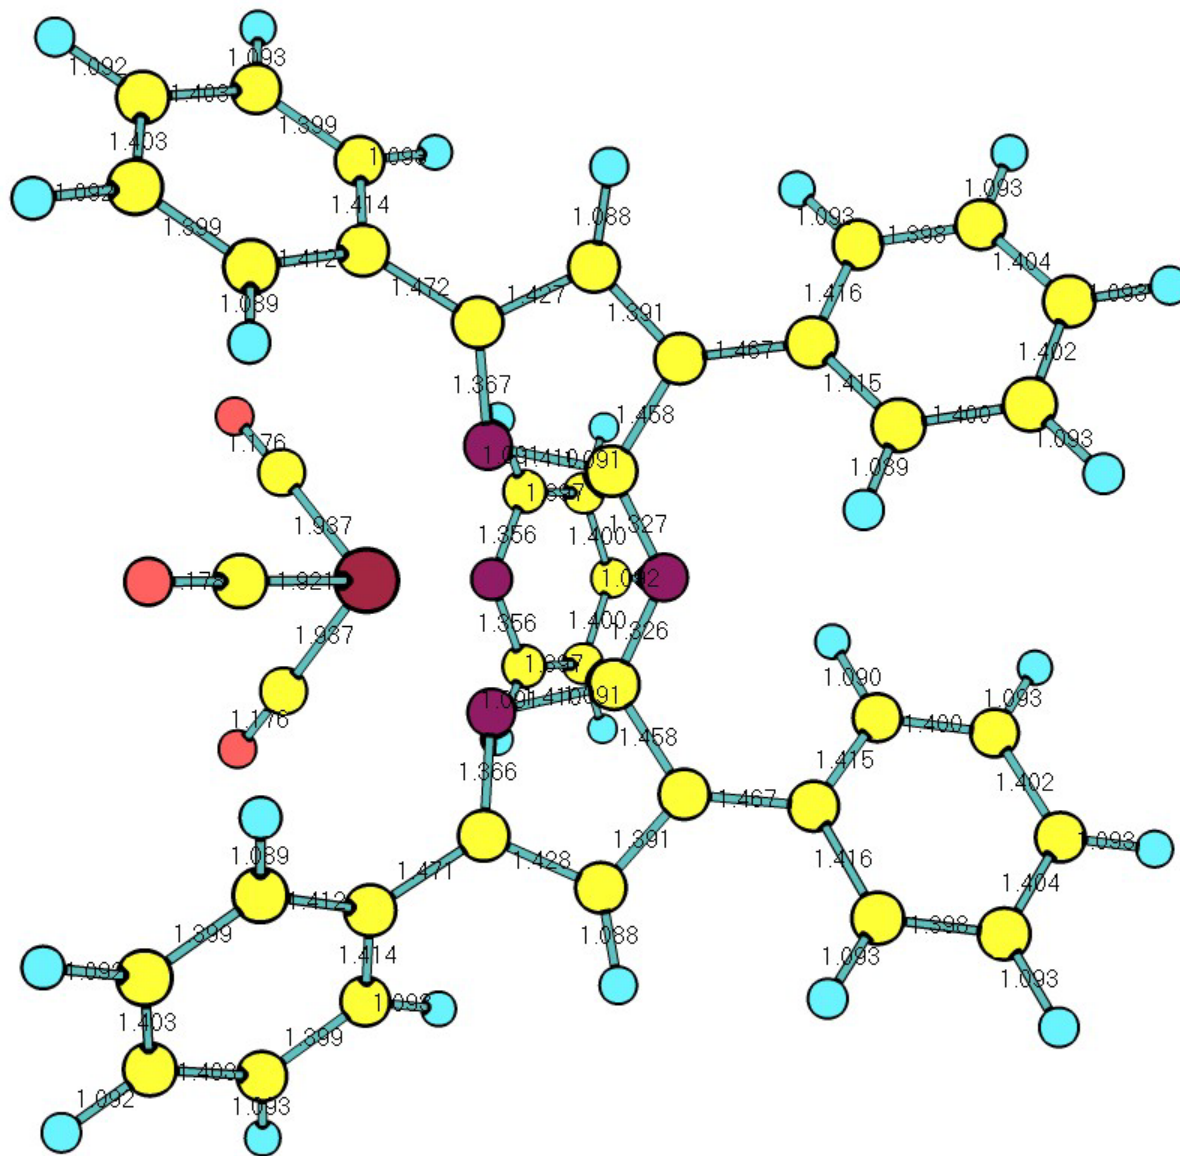

**Figure S4.** Optimized bond lengths (Å) of **2**.
